# Supplementary figures and images for: Cellulosic/Polyvinyl Alcohol Composite Hydrogel: Synthesis, Characterization and Applications in Tissue Engineering
Source: MDPI journal article supplement (doi:10.3390/polym13203598), 2021-10-19

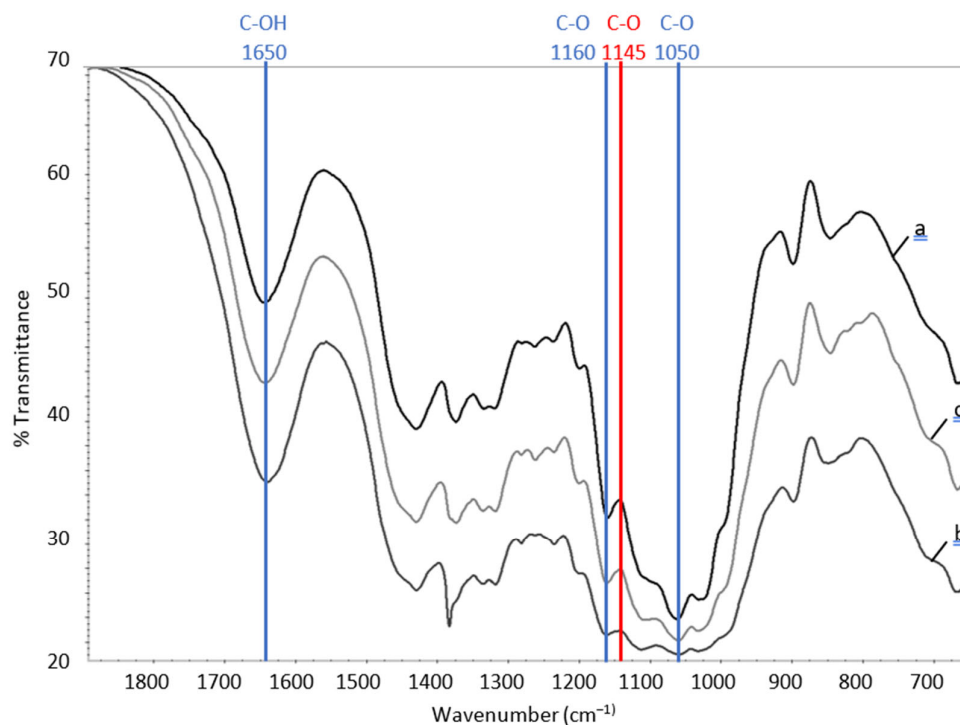

**Figure S1.** Zoom of PVA and DAC-based composite scaffolds FT-IR spectra (a: DAC 9%, b: DAC 18%, c: DAC 36%/PVA (2:1) NaCl)

Supplement: s1 [file s1]
